# Supplementary material for: Development of an IgY-Based Treatment to Control Bovine Coronavirus Diarrhea in Dairy Calves
Source: MDPI journal article supplement (doi:10.3390/v15030708), 2023-03-09
Supplement: s1 [file s1]

File S1. Regression analysis from ELISA vs VN Ab titers.

| SAMPLE   | ELISA | VN   | LOG10_VN | LOG10_ELISA | RDUO<br>LOG10_VN | PRED LOG10_VN |
|----------|-------|------|----------|-------------|------------------|---------------|
| 1        | 65536 | 512  | 2.71     | 4.82        | 0.13             | 2.57          |
| 2        | 16384 | 128  | 2.11     | 4.21        | -0.06            | 2.17          |
| 3        | 65536 | 512  | 2.71     | 4.82        | 0.13             | 2.57          |
| 4        | 65536 | 1024 | 3.01     | 4.82        | 0.44             | 2.57          |
| BATCH 1  | 16    | 2    | 0.3      | 1.2         | 0.18             | 0.12          |
| BATCH 2  | 16    | 2    | 0.3      | 1.2         | 0.18             | 0.12          |
| BATCH 3  | 16    | 2    | 0.3      | 1.2         | 0.18             | 0.12          |
| BATCH 4  | 16    | 2    | 0.3      | 1.2         | 0.18             | 0.12          |
| BATCH 5  | 16    | 2    | 0.3      | 1.2         | 0.18             | 0.12          |
| BATCH 6  | 16    | 2    | 0.3      | 1.2         | 0.18             | 0.12          |
| BATCH 7  | 64    | 2    | 0.3      | 1.81        | -0.23            | 0.53          |
| BATCH 8  | 64    | 2    | 0.3      | 1.81        | -0.23            | 0.53          |
| BATCH 9  | 256   | 4    | 0.6      | 2.41        | -0.34            | 0.94          |
| BATCH 10 | 256   | 4    | 0.6      | 2.41        | -0.34            | 0.94          |
| BATCH 11 | 1024  | 16   | 1.2      | 3.01        | -0.14            | 1.35          |
| BATCH 12 | 1024  | 16   | 1.2      | 3.01        | -0.14            | 1.35          |
| BATCH 13 | 1024  | 16   | 1.2      | 3.01        | -0.14            | 1.35          |
| 30       | 512   | 8    | 0.9      | 2.71        | -0.24            | 1.14          |
| 31       | 512   | 8    | 0.9      | 2.71        | -0.24            | 1.14          |
| 35       | 256   | 4    | 0.6      | 2.41        | -0.34            | 0.94          |
| 36       | 128   | 8    | 0.9      | 2.11        | 0.17             | 0.74          |
| 37       | 128   | 8    | 0.9      | 2.11        | 0.17             | 0.74          |
| 38       | 128   | 8    | 0.9      | 2.11        | 0.17             | 0.74          |
| 39       | 128   | 8    | 0.9      | 2.11        | 0.17             | 0.74          |
| 40       | 128   | 8    | 0.9      | 2.11        | 0.17             | 0.74          |
| 41       | 128   | 8    | 0.9      | 2.11        | 0.17             | 0.74          |
| 42       | 128   | 8    | 0.9      | 2.11        | 0.17             | 0.74          |
| 43       | 128   | 8    | 0.9      | 2.11        | 0.17             | 0.74          |
| 44       | 512   | 16   | 1.2      | 2.71        | 0.06             | 1.14          |
| 45       | 128   | 4    | 0.6      | 2.11        | -0.13            | 0.74          |
| 46       | 128   | 4    | 0.6      | 2.11        | -0.13            | 0.74          |
| 47       | 128   | 4    | 0.6      | 2.11        | -0.13            | 0.74          |
| 48       | 128   | 4    | 0.6      | 2.11        | -0.13            | 0.74          |
| 49       | 128   | 4    | 0.6      | 2.11        | -0.13            | 0.74          |
| 50       | 256   | 8    | 0.9      | 2.41        | -0.04            | 0.94          |

### Linear regression analysis

| Variable | N  | R <sup>2</sup> | R <sup>2</sup> Aj | ECMP | AIC   | BIC   |
|----------|----|----------------|-------------------|------|-------|-------|
| LOG10_VN | 35 | 0.92           | 0.91              | 0.05 | -8.18 | -3.52 |

### Regression coefficients and associated statistics

| Coef        | Est.  | E.E. | LI (95%) | LS (95%) | T     | p-value |
|-------------|-------|------|----------|----------|-------|---------|
| const       | -0.69 | 0.09 | -0.88    | -0.51    | -7.55 | <0.0001 |
| LOG10_ELISA | 0.68  | 0.04 | 0.61     | 0.75     | 19.04 | <0.0001 |

Variance Analysis (SC type III)

| F.V.        | SC    | gl | CM    | F      | p-valor |
|-------------|-------|----|-------|--------|---------|
| Model       | 15.01 | 1  | 15.01 | 362.52 | <0.0001 |
| LOG10_ELISA | 15.01 | 1  | 15.01 | 362.52 | <0.0001 |
| Error       | 1.37  | 33 | 0.04  |        |         |
| Total       | 16.38 | 34 |       |        |         |

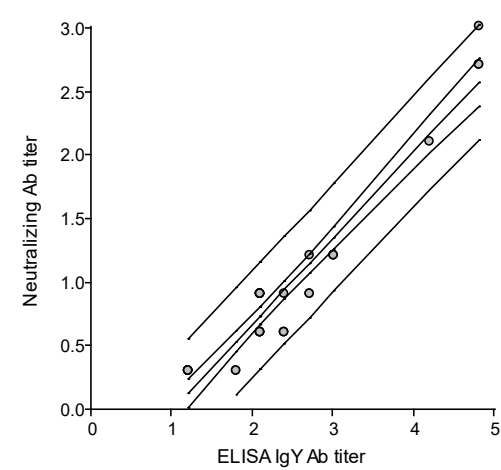

Shapiro-Wilks (modified)

| Variable      | n  | Media | D.E. | W*   | p(Unilateral D) |
|---------------|----|-------|------|------|-----------------|
| LOG10_VN      | 35 | 0.93  | 0.69 | 0.74 | <0.0001         |
| RDUO LOG10_VN | 35 | 0.00  | 0.20 | 0.86 | 0.0003          |

Correlation coefficients

Spearman Correlation: Coefficient/probabilities

|             | LOG10_VN | LOG10_ELISA |
|-------------|----------|-------------|
| LOG10_VN    | 1.00     | 1.1E-11     |
| LOG10_ELISA | 0.87     | 1.00        |

Base 2 transformation

Linear Regression Analysis

| Variable   | N  | R <sup>2</sup> | R <sup>2</sup> Aj | ECMP | AIC   | BIC    |
|------------|----|----------------|-------------------|------|-------|--------|
| LOG2_ELISA | 35 | 0.92           | 0.91              | 1.03 | 99.96 | 104.63 |

## Regression coefficients and associated statistics

| Coef    | Est. | E.E. | LI (95%) | LS (95%) | T     | p-value |
|---------|------|------|----------|----------|-------|---------|
| const   | 3.77 | 0.27 | 3.22     | 4.33     | 13.88 | <0.0001 |
| LOG2_VN | 1.35 | 0.07 | 1.21     | 1.50     | 19.04 | <0.0001 |

## Variance Analysis (SC type III)

| F.V.    | SC     | gl | CM     | F      | p-value |
|---------|--------|----|--------|--------|---------|
| Model   | 329.86 | 1  | 329.86 | 362.52 | <0.0001 |
| LOG2_VN | 329.86 | 1  | 329.86 | 362.52 | <0.0001 |
| Error   | 30.03  | 33 | 0.91   |        |         |
| Total   | 359.89 | 34 |        |        |         |

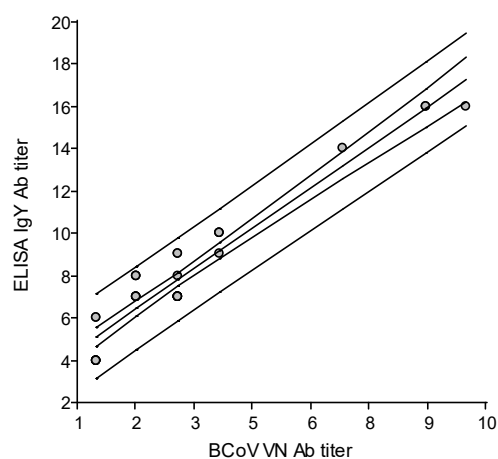

## Shapiro-Wilks (modified)

| Variable        | n  | Media | D.E. | W*   | p(Unilateral D) |
|-----------------|----|-------|------|------|-----------------|
| LOG2_ELISA      | 35 | 7.94  | 3.25 | 0.81 | <0.0001         |
| RDUO LOG2_ELISA | 35 | 0.00  | 0.94 | 0.85 | <0.0001         |

No normality in residues

## Correlation Coefficients

*Spearman Correlation: Coefficient/probabilities*

|            | LOG2_VN | LOG2_ELISA |
|------------|---------|------------|
| LOG2_VN    | 1.00    | 1.1E-11    |
| LOG2_ELISA | 0.87    | 1.00       |

## Second-grade linearity is tested

### Linear Regression analysis

| Variable | N  | R <sup>2</sup> | R <sup>2</sup> Aj | ECMP | AIC   | BIC   |
|----------|----|----------------|-------------------|------|-------|-------|
| LOG2_VN  | 35 | 0.95           | 0.95              | 0.34 | 61.05 | 67.27 |

Regression coefficients and associated statistics

| Coef         | Est. | E.E. | LI (95%) | LS (95%) | T    | p-valor |
|--------------|------|------|----------|----------|------|---------|
| const        | 0.27 | 0.63 | -1.01    | 1.55     | 0.43 | 0.6695  |
| LOG2_ELISA   | 0.36 | 0.52 | 0.60     | 0.72     |      |         |
| LOG2_ELISA^2 | 0.03 | 0.01 | 0.02     | 0.04     | 4.44 | 0.0001  |

LOG2\_ELISA 0.07 0.14 -0.21

Variance Analysis (SC tipo I)

| F.V.         | SC     | gl | CM     | F      | p-valor |
|--------------|--------|----|--------|--------|---------|
| Model        | 171.41 | 2  | 85.71  | 294.01 | <0.0001 |
| LOG2_ELISA   | 165.66 | 1  | 165.66 | 568.29 | <0.0001 |
| LOG2_ELISA^2 | 5.75   | 1  | 5.75   | 19.73  | 0.0001  |
| Error        | 9.33   | 32 | 0.29   |        |         |
| Total        | 180.74 | 34 |        |        |         |

Variance Analysis (SC type III)

| F.V.       | SC     | gl | CM    | F      | p-valor |
|------------|--------|----|-------|--------|---------|
| Model      | 171.41 | 2  | 85.71 | 294.01 | <0.0001 |
| LOG2_ELISA | 171.41 | 2  | 85.71 | 294.01 | <0.0001 |
| Error      | 9.33   | 32 | 0.29  |        |         |
| Total      | 180.74 | 34 |       |        |         |

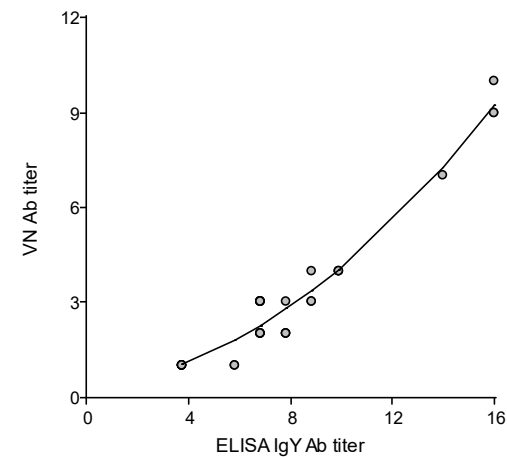

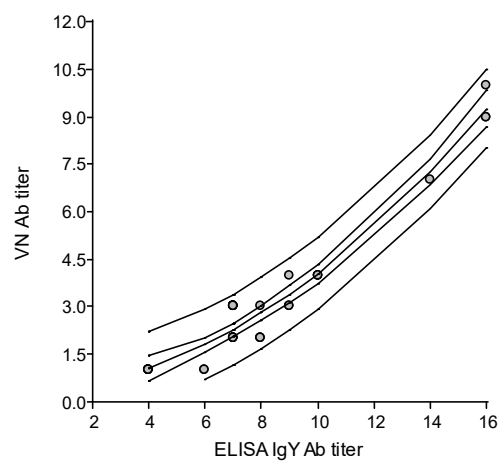

$$0.27 + \log_2 \text{ELISA} - 0.07 + \log_2 \text{ELISA}^2 = \log_2 \text{VN}$$

$$R^2 = 0.95, p < 0.0001$$

Shapiro-Wilks (modified)

| Variable        | n  | Media | D.E. | W*   | p(Unilateral D) |
|-----------------|----|-------|------|------|-----------------|
| LOG2_VN         | 35 | 3.09  | 2.31 | 0.74 | <0.0001         |
| LOG2_ELISA      | 35 | 7.94  | 3.25 | 0.81 | <0.0001         |
| RDUO LOG2 ELISA | 35 | 0.00  | 0.94 | 0.85 | <0.0001         |

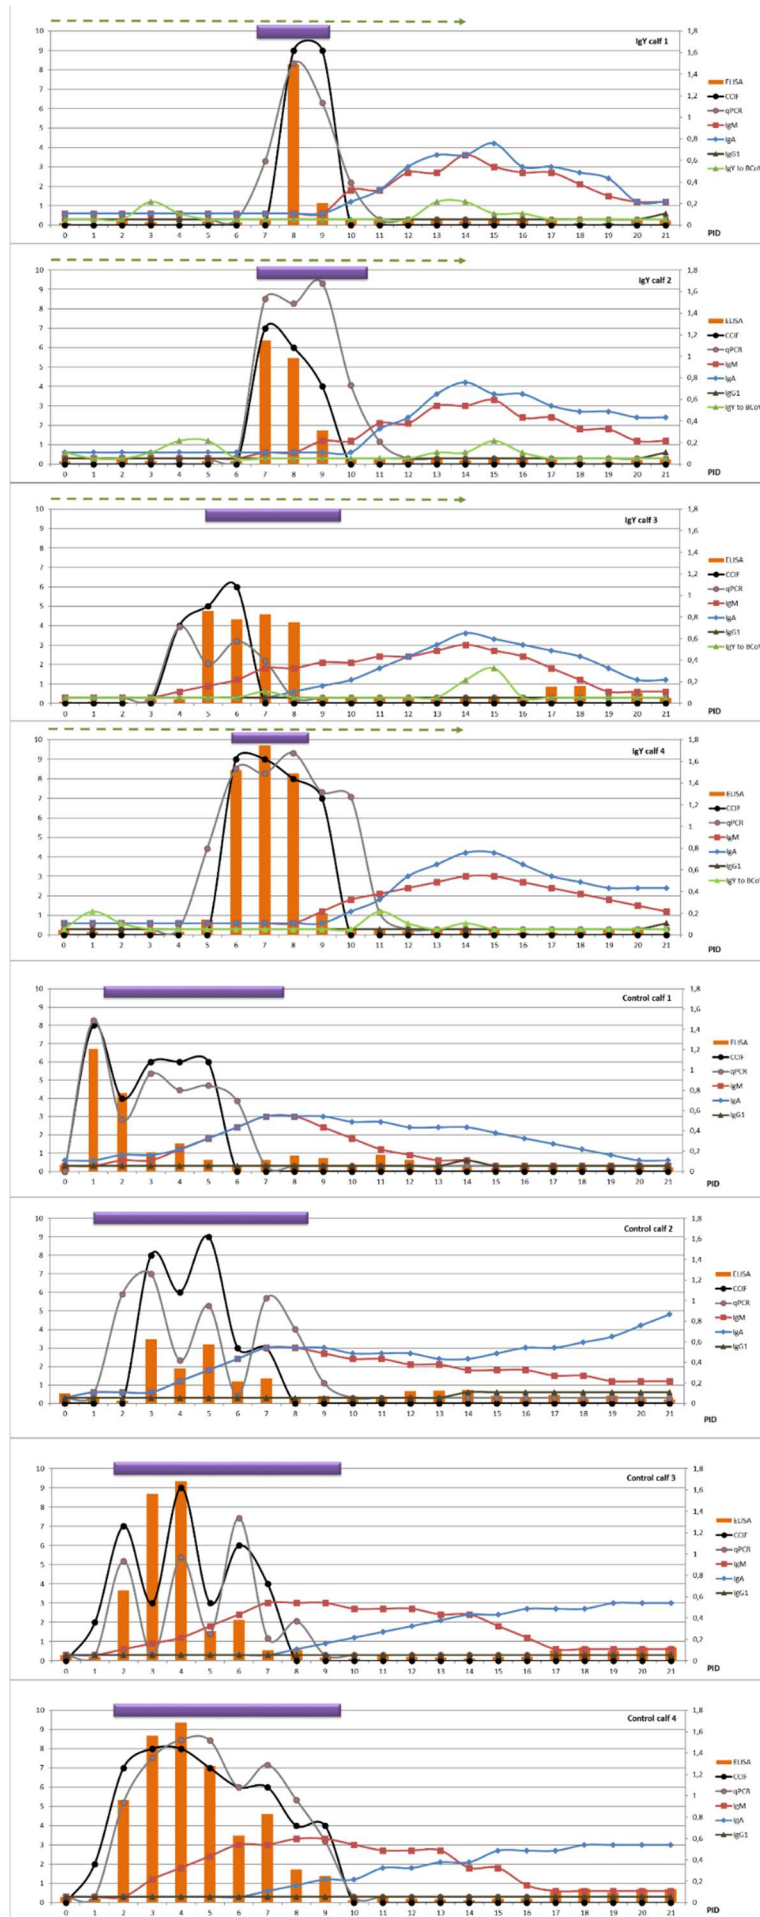

**Figure S1.** Diarrhea evolution in each calf from the IgY-treated group and control group. Calves from Gp 1 were treated twice a day for 14 days with 40 g of BCoV-specific egg powder in 2 L of milk with a final BCoV ELISA IgY Ab titer of 512 (horizontal arrow). BCoV shedding was measured by CCIF, qRT-PCR, and antigen ELISA expressed in the logarithm of FFU, Cq-value, and Ag ELISA titers expressed in OD from samples diluted 1/10 in PBS. All animals were orally inoculated with 10<sup>6</sup> FFU of Arg95 strain (0 post-inoculation days (0 PID)) and euthanized at 21 PID. Horizontal bars represent the mean for each group of diarrhea duration (days). BCoV-specific IgM, IgA, IgG1, and IgY titers in fecal samples were expressed in logarithms.

**Table S1.** Fecal Scores and rectal temperature. Fecal consistency was scored from 0 to 3 every day from 0 DPI to 21 PID (0: normal; 1: pasty; 2: semi-liquid; 3: liquid). A score equal to or greater than 2 was considered diarrhea. Rectal temperature was measured every day from 0 DPI to 21 PID. Temperature higher than 39.4°C was considered hyperthermia.

| Group   | Score |    |    |    | Rectal Temperature |      |      |      | Group | Score |    |    |    | Rectal Temperature |      |      |      |
|---------|-------|----|----|----|--------------------|------|------|------|-------|-------|----|----|----|--------------------|------|------|------|
|         | C1    | C2 | C3 | C4 | C1                 | C2   | C3   | C4   |       | C1    | C2 | C3 | C4 | C1                 | C2   | C3   | C4   |
| Control | 1     | 0  | 0  | 0  | 39.4               | 39.1 | 38.5 | 38.8 | IgY   | 0     | 1  | 1  | 1  | 39.2               | 38.6 | 38.6 | 38.8 |
|         | 3     | 2  | 3  | 0  | 39.2               | 38.9 | 39.5 | 39.3 |       | 0     | 1  | 0  | 1  | 39.3               | 39.1 | 38.8 | 38.7 |
|         | 3     | 2  | 2  | 3  | 39.0               | 40.6 | 40.0 | 39.6 |       | 1     | 1  | 1  | 1  | 38.9               | 40.0 | 39.1 | 38.8 |
|         | 3     | 2  | 3  | 3  | 39.0               | 38.8 | 39.7 | 40.3 |       | 1     | 1  | 1  | 1  | 38.8               | 38.9 | 39.0 | 39.0 |
|         | 3     | 3  | 3  | 3  | 40.3               | 41.1 | 39.1 | 39.4 |       | 1     | 1  | 1  | 1  | 39.4               | 39.3 | 39.3 | 39.1 |
|         | 3     | 3  | 3  | 3  | 40.3               | 39.4 | 39.9 | 41.0 |       | 3     | 1  | 1  | 1  | 40.5               | 39.1 | 39.8 | 38.9 |
|         | 3     | 3  | 2  | 3  | 38.9               | 39.9 | 39.7 | 39.3 |       | 3     | 2  | 1  | 1  | 39.1               | 38.0 | 39.4 | 39.8 |
|         | 2     | 3  | 2  | 3  | 40.6               | 39.9 | 39.9 | 39.6 |       | 3     | 2  | 2  | 2  | 39.0               | 39.3 | 39.9 | 40.1 |
|         | 1     | 2  | 2  | 2  | 39.6               | 40.7 | 39.3 | 39.2 |       | 3     | 2  | 2  | 3  | 38.8               | 38.8 | 39.2 | 39.4 |
|         | 1     | 1  | 1  | 2  | 39.4               | 39.4 | 38.8 | 39.4 |       | 3     | 1  | 2  | 2  | 38.8               | 39.0 | 39.1 | 39.2 |
|         | 1     | 1  | 1  | 1  | 39.4               | 39.3 | 39.2 | 38.9 |       | 1     | 0  | 2  | 1  | 38.4               | 38.9 | 38.8 | 39.2 |
|         | 1     | 1  | 1  | 1  | 39.3               | 39.0 | 39.0 | 39.0 |       | 1     | 1  | 1  | 1  | 39.3               | 39.2 | 38.9 | 38.8 |
|         | 1     | 1  | 1  | 1  | 39.3               | 38.8 | 38.8 | 39.2 |       | 1     | 1  | 1  | 1  | 39.2               | 38.7 | 39.0 | 38.9 |
|         | 1     | 1  | 1  | 0  | 39.4               | 38.9 | 39.4 | 38.9 |       | 1     | 1  | 1  | 1  | 39.4               | 38.6 | 39.1 | 38.7 |
|         | 1     | 1  | 1  | 0  | 39.2               | 38.8 | 39.4 | 38.8 |       | 1     | 1  | 1  | 0  | 39.1               | 39.0 | 38.8 | 38.8 |
|         | 0     | 1  | 1  | 1  | 39.1               | 39.3 | 39.2 | 39.2 |       | 1     | 0  | 1  | 1  | 39.0               | 39.1 | 39.2 | 39.0 |
|         | 0     | 1  | 1  | 0  | 39.0               | 39.1 | 38.9 | 39.0 |       | 0     | 1  | 1  | 1  | 39.4               | 38.9 | 38.7 | 39.2 |
|         | 1     | 1  | 0  | 0  | 39.4               | 39.4 | 39.3 | 39.2 |       | 0     | 1  | 0  | 0  | 39.2               | 38.9 | 38.8 | 38.9 |
|         | 0     | 1  | 1  | 0  | 39.2               | 39.4 | 39.1 | 39.3 |       | 1     | 1  | 1  | 1  | 39.2               | 39.0 | 38.9 | 38.8 |
|         | 0     | 1  | 1  | 1  | 39.2               | 38.7 | 39.4 | 39.3 |       | 1     | 1  | 1  | 1  | 38.9               | 38.8 | 38.9 | 39.0 |
|         | 0     | 0  | 1  | 1  | 39.3               | 38.9 | 38.8 | 39.1 |       | 1     | 1  | 1  | 1  | 38.8               | 38.4 | 39.0 | 38.9 |
|         | 1     | 0  | 1  | 0  | 39.0               | 39.0 | 38.9 | 39.3 |       | 1     | 1  | 1  | 1  | 39.0               | 39.0 | 38.8 | 39.1 |
